# Supplementary material
Source: ML conference proceedings conference paper supplement (https://proceedings.neurips.cc/paper_files/paper/2020/hash/1006ff12c465532f8c574aeaa4461b16-Abstract.html)
Supplement: Supplementary file [file 1006ff12c465532f8c574aeaa4461b16-Supplemental.pdf]

---

# On the Similarity between the Laplace and Neural Tangent Kernels

– Supplementary Material –

---

Amnon Geifman<sup>1</sup>

Abhay Yadav<sup>2</sup>

Yoni Kasten<sup>1</sup>

Meirav Galun<sup>1</sup>

David Jacobs<sup>2</sup>

Ronen Basri<sup>1</sup>

<sup>1</sup>Department of Computer Science, Weizmann Institute of Science, Rehovot, Israel

<sup>2</sup>Department of Computer Science, University of Maryland, College Park, MD

## A Formulas for NTK

We begin by providing the recursive definition of NTK for fully connected (FC) networks with bias initialized at zero. The formulation includes a parameter  $\beta$  that when set to zero the recursive formula coincides with the formula given in [1] for bias-free networks.

**The network model.** We consider a  $L$ -hidden-layer fully-connected neural network (in total  $L + 1$  layers) with bias. Let  $\mathbf{x} \in \mathbb{R}^d$  (and denote  $d_0 = d$ ), we assume each layer  $l \in [L]$  of hidden units includes  $d_l$  units. The network model is expressed as

$$\begin{aligned}\mathbf{g}^{(0)}(\mathbf{x}) &= \mathbf{x} \\ \mathbf{f}^{(l)}(\mathbf{x}) &= W^{(l)}\mathbf{g}^{(l-1)}(\mathbf{x}) + \beta\mathbf{b}^{(l)} \in \mathbb{R}^{d_l}, \quad l = 1, \dots, L \\ \mathbf{g}^{(l)}(\mathbf{x}) &= \sqrt{\frac{c_\sigma}{d_l}}\sigma\left(\mathbf{f}^{(l)}(\mathbf{x})\right) \in \mathbb{R}^{d_l}, \quad l = 1, \dots, L \\ f(\theta, \mathbf{x}) &= f^{(L+1)}(\mathbf{x}) = W^{(L+1)} \cdot \mathbf{g}^{(L)}(\mathbf{x}) + \beta b^{(L+1)}\end{aligned}$$

The network parameters  $\theta$  include  $W^{(L+1)}, W^{(L)}, \dots, W^{(1)}$ , where  $W^{(l)} \in \mathbb{R}^{d_l \times d_{l-1}}$ ,  $\mathbf{b}^{(l)} \in \mathbb{R}^{d_l \times 1}$ ,  $W^{(L+1)} \in \mathbb{R}^{1 \times d_L}$ ,  $b^{(L+1)} \in \mathbb{R}$ ,  $\sigma$  is the activation function and  $c_\sigma = 1 / (\mathbb{E}_{z \sim \mathcal{N}(0,1)}[\sigma(z)^2])$ . The network parameters are initialized with  $\mathcal{N}(0, I)$ , except for the biases  $\{\mathbf{b}^{(1)}, \dots, \mathbf{b}^{(L)}, b^{(L+1)}\}$ , which are initialized with zero.

**The recursive formula for NTK.** The recursive formula in [9] assumes the bias is initialized with a normal distribution. Here we assume the bias is initialized at zero, yielding a slightly different formulation, which can be readily derived from [9]’s formulation.

Given  $\mathbf{x}, \mathbf{z} \in \mathbb{R}^d$ , we denote the NTK for this fully connected network with bias by  $\mathbf{k}^{\text{FC}_\beta^{(L+1)}}(\mathbf{x}, \mathbf{z}) := \Theta^{(L)}(\mathbf{x}, \mathbf{z})$ . The kernel  $\Theta^{(L)}(\mathbf{x}, \mathbf{z})$  is defined using the following recursive definition. Let  $h \in [L]$  then

$$\Theta^{(h)}(\mathbf{x}, \mathbf{z}) = \Theta^{(h-1)}(\mathbf{x}, \mathbf{z})\dot{\Sigma}^{(h)}(\mathbf{x}, \mathbf{z}) + \Sigma^{(h)}(\mathbf{x}, \mathbf{z}) + \beta^2, \quad (1)$$

where

$$\begin{aligned}\Sigma^{(0)}(\mathbf{x}, \mathbf{z}) &= \mathbf{x}^T \mathbf{z} \\ \Theta^{(0)}(\mathbf{x}, \mathbf{z}) &= \Sigma^{(0)}(\mathbf{x}, \mathbf{z}) + \beta^2.\end{aligned}$$

and we define

$$\begin{aligned}\Sigma^{(h)}(\mathbf{x}, \mathbf{z}) &= c_\sigma \mathbb{E}_{(u,v) \sim N(0, \Lambda^{(h-1)})} (\sigma(u)\sigma(v)) \\ \dot{\Sigma}^{(h)}(\mathbf{x}, \mathbf{z}) &= c_\sigma \mathbb{E}_{(u,v) \sim N(0, \Lambda^{(h-1)})} (\dot{\sigma}(u)\dot{\sigma}(v)) \\ \Lambda^{(h-1)} &= \begin{pmatrix} \Sigma^{(h-1)}(\mathbf{x}, \mathbf{x}) & \Sigma^{(h-1)}(\mathbf{x}, \mathbf{z}) \\ \Sigma^{(h-1)}(\mathbf{z}, \mathbf{x}) & \Sigma^{(h-1)}(\mathbf{z}, \mathbf{z}) \end{pmatrix}.\end{aligned}$$

Now, let

$$\lambda^{(h-1)}(\mathbf{x}, \mathbf{z}) = \frac{\Sigma^{(h-1)}(\mathbf{x}, \mathbf{z})}{\sqrt{\Sigma^{(h-1)}(\mathbf{x}, \mathbf{x})\Sigma^{(h-1)}(\mathbf{z}, \mathbf{z})}}. \quad (2)$$

By definition  $|\lambda^{(h-1)}| \leq 1$ , and for ReLU activation we have  $c_\sigma = 2$  and

$$\Sigma^{(h)}(\mathbf{x}, \mathbf{z}) = c_\sigma \frac{\lambda^{(h-1)}(\pi - \arccos(\lambda^{(h-1)})) + \sqrt{1 - (\lambda^{(h-1)})^2}}{2\pi} \sqrt{\Sigma^{(h-1)}(\mathbf{x}, \mathbf{x})\Sigma^{(h-1)}(\mathbf{z}, \mathbf{z})} \quad (3)$$

$$\dot{\Sigma}^{(h)}(\mathbf{x}, \mathbf{z}) = c_\sigma \frac{\pi - \arccos(\lambda^{(h-1)})}{2\pi}. \quad (4)$$

The parameter  $\beta$  allows us to consider a fully-connected network either with ( $\beta > 0$ ) or without bias ( $\beta = 0$ ). When  $\beta = 0$ , the recursive formulation is the same as existing derivations, e.g., [9]. Finally, the normalized NTK of a FC network with  $L + 1$  layers, without bias, is given by  $\frac{1}{L+1} \mathbf{k}^{\text{FC}_0(L+1)}(\mathbf{x}_i, \mathbf{x}_j)$ .

**NTK for a two-layer FC network on  $\mathbb{S}^{d-1}$ .** Using the recursive formulation above, for points on the hypersphere  $\mathbb{S}^{d-1}$  NTK for a two-layer FC network with bias initialized at 0, is as follows. Let  $u = \mathbf{x}^T \mathbf{z}$ , with  $\mathbf{x}, \mathbf{z} \in \mathbb{S}^{d-1}$ . Then,

$$\begin{aligned}\mathbf{k}^{\text{FC}_\beta(2)}(\mathbf{x}, \mathbf{z}) &= \Theta^{(1)}(\mathbf{x}, \mathbf{z}) \\ &= \Theta^{(0)}(\mathbf{x}, \mathbf{z})\dot{\Sigma}^{(1)}(\mathbf{x}, \mathbf{z}) + \Sigma^{(1)}(\mathbf{x}, \mathbf{z}) + \beta^2 \\ &= (u + \beta^2) \frac{\pi - \arccos(u)}{\pi} + \frac{u(\pi - \arccos(u)) + \sqrt{1 - u^2}}{\pi} + \beta^2.\end{aligned}$$

Rearranging, we get

$$\mathbf{k}^{\text{FC}_\beta(2)}(\mathbf{x}, \mathbf{z}) = \mathbf{k}^{\text{FC}_\beta(2)}(u) = \frac{1}{\pi} \left( (2u + \beta^2)(\pi - \arccos(u)) + \sqrt{1 - u^2} \right) + \beta^2. \quad (5)$$

## B NTK on $\mathbb{S}^{d-1}$

This section provides a characterization of NTK on the hypersphere  $\mathbb{S}^{d-1}$  under the uniform measure. The recursive formulas of the kernels are given in Appendix A.

**Lemma 1.** Let  $\mathbf{k}^{\text{FC}_\beta(L)}(\mathbf{x}, \mathbf{z})$ ,  $\mathbf{x}, \mathbf{z} \in \mathbb{S}^{d-1}$ , denote the NTK kernels for FC networks with  $L \geq 2$  layers, possibly with bias initialized with zero. This kernel is zonal, i.e.,  $\mathbf{k}^{\text{FC}_\beta(L)}(\mathbf{x}, \mathbf{z}) = \mathbf{k}^{\text{FC}_\beta(L)}(\mathbf{x}^T \mathbf{z})$ .

*Proof.* See Appendix D. □

To prove the next theorem, we recall several results on the the arithmetics of RKHS, following [8, 15].

### B.1 RKHS for sums and products of kernels.

Let  $\mathbf{k}_1, \mathbf{k}_2 : \mathcal{X} \times \mathcal{X} \rightarrow \mathbb{R}$  be kernels with RKHS  $\mathcal{H}_{\mathbf{k}_1}$  and  $\mathcal{H}_{\mathbf{k}_2}$ , respectively. Then,

1. **Aronszajn's kernel sum theorem.** The RKHS for  $\mathbf{k} = \mathbf{k}_1 + \mathbf{k}_2$  is given by  $\mathcal{H}_{\mathbf{k}_1 + \mathbf{k}_2} = \{f_1 + f_2 \mid f_1 \in \mathcal{H}_{\mathbf{k}_1}, f_2 \in \mathcal{H}_{\mathbf{k}_2}\}$

2. This yields the **kernel sum inclusion**.  $\mathcal{H}_{\mathbf{k}_1}, \mathcal{H}_{\mathbf{k}_2} \subseteq \mathcal{H}_{\mathbf{k}_1 + \mathbf{k}_2}$
3. **Norm addition inequality**.  $\|f_1 + f_2\|_{\mathcal{H}_{\mathbf{k}_1 + \mathbf{k}_2}} \leq \|f_1\|_{\mathcal{H}_{\mathbf{k}_1}} + \|f_2\|_{\mathcal{H}_{\mathbf{k}_2}}$
4. **Norm product inequality**.  $\|f_1 \cdot f_2\|_{\mathcal{H}_{\mathbf{k}_1 \cdot \mathbf{k}_2}} \leq \|f_1\|_{\mathcal{H}_{\mathbf{k}_1}} \cdot \|f_2\|_{\mathcal{H}_{\mathbf{k}_2}}$
5. **Aronszajn's inclusion theorem**.  $\mathcal{H}_{\mathbf{k}_1} \subseteq \mathcal{H}_{\mathbf{k}_2}$  if and only if  $\exists s > 0$ , such that  $\mathbf{k}_1 \ll s^2 \mathbf{k}_2$ , where the latter notation means that  $s^2 \mathbf{k}_2 - \mathbf{k}_1$  is a positive definite kernel over  $\mathcal{X}$ .

## B.2 The decay rate of the eigenvalues of NTK

**Theorem 1.** Let  $\mathbf{x}, \mathbf{z} \in \mathbb{S}^{d-1}$ . With bias initialized at zero and  $\beta > 0$ :

1.  $\mathbf{k}^{\text{FC}_\beta(L)}$  can be decomposed according to

$$\mathbf{k}^{\text{FC}_\beta(L)}(\mathbf{x}, \mathbf{z}) = \sum_{k=0}^{\infty} \lambda_k \sum_{j=1}^{N(d,k)} Y_{k,j}(\mathbf{x}) Y_{k,j}(\mathbf{z}), \quad (6)$$

with  $\lambda_k > 0$  for all  $k \geq 0$  and into  $Y_{k,j}$  are the spherical harmonics of  $\mathbb{S}^{d-1}$ , and

2.  $\exists k_0$  and constants  $C_1, C_2, C_3 > 0$  that depend on the dimension  $d$  such that  $\forall k > k_0$ 
  - (a)  $C_1 k^{-d} \leq \lambda_k \leq C_2 k^{-d}$  if  $L = 2$ , and
  - (b)  $C_3 k^{-d} \leq \lambda_k$  if  $L \geq 3$ .

We split the theorem into the next two lemmas. The first lemma handles NTK of two-layer FC networks with bias, and the second lemma handles NTK for deep networks.

**Lemma 2.** Let  $\mathbf{x}, \mathbf{z} \in \mathbb{S}^{d-1}$  and  $\mathbf{k}^{\text{FC}_\beta(2)}(\mathbf{x}^T \mathbf{z})$  as defined in (5) with  $\beta > 0$ . Then,  $\mathbf{k}^{\text{FC}_\beta(2)}$  decomposes according to (6) where  $\lambda_k > 0$  for all  $k \geq 0$  and  $\exists k_0$  such that  $\forall k \geq k_0$

$$C_1 k^{-d} \leq \lambda_k \leq C_2 k^{-d},$$

where  $C_1, C_2 > 0$  are constants that depend on the dimension  $d$ .

*Proof.* To prove the lemma we leverage the results of [3, 5]. First, under the assumption of the uniform measure on  $\mathbb{S}^{d-1}$ , we can apply Mercer decomposition to  $\mathbf{k}^{\text{FC}_\beta(2)}(\mathbf{x}, \mathbf{z})$ , where the eigenfunctions are the spherical harmonics. This is due to the observation that  $\mathbf{k}^{\text{FC}_\beta(2)}(\mathbf{x}, \mathbf{z})$  is positive and zonal in  $\mathbb{S}^{d-1}$ . It is zonal by Lemma 1 and positive, since  $\mathbf{k}^{\text{FC}_\beta(2)}$  can be decomposed as

$$\begin{aligned} \mathbf{k}^{\text{FC}_\beta(2)}(u) &= \frac{1}{\pi} \left( (2u + \beta^2)(\pi - \arccos(u)) + \sqrt{1 - u^2} \right) + \beta^2 \\ &= \frac{1}{\pi} \left( 2u(\pi - \arccos(u)) + \sqrt{1 - u^2} \right) + \frac{1}{\pi} \beta^2 (\pi - \arccos(u)) + \beta^2 \\ &:= \kappa(\mathbf{x}^T \mathbf{z}) + \beta^2 \kappa_0(\mathbf{x}^T \mathbf{z}) + \beta^2, \end{aligned}$$

where  $\kappa(\mathbf{x}^T \mathbf{z})$  is the NTK for a bias-free, two-layer network introduced in [5] and  $\kappa_0(\mathbf{x}^T \mathbf{z})$  is known to be the zero-order arc-cosine kernel [6]. By kernel arithmetic, this yields another kernel and this means that  $\mathbf{k}^{\text{FC}_\beta(2)}$  is a positive kernel.

Furthermore, according to Proposition 5 in [5]

$$\kappa(\mathbf{x}^T \mathbf{z}) = \sum_{k=0}^{\infty} \mu_k \sum_{j=1}^{N(d,k)} Y_{k,j}(\mathbf{x}) Y_{k,j}(\mathbf{z}),$$

where  $Y_{k,j}, j = 1, \dots, N(d,k)$  are spherical harmonics of degree  $k$ , and the eigenvalues  $\mu_k$  satisfy  $\mu_0, \mu_1 > 0, \mu_k = 0$  if  $k = 2j + 1$  with  $j \geq 1$  and otherwise,  $\mu_k > 0$  and  $\mu_k \sim C(d)k^{-d}$  as  $k \rightarrow \infty$ , with  $C(d)$  a constant depending only on  $d$ . Next, following Lemma 17 in [5] the eigenvalues of  $\kappa_0(\mathbf{x}^T \mathbf{z})$ , denoted  $\eta_k$  satisfy  $\eta_0, \eta_1 > 0, \eta_k > 0$  if  $k = 2j + 1$ , with  $j \geq 1$  and behave asymptotically as  $C_0(d)k^{-d}$ . Consequently,  $\mathbf{k}^{\text{FC}_\beta(2)} = \kappa + \beta^2 \kappa_0 + \beta^2$ , and since both  $\kappa$  and  $\kappa_0$  have the spherical

harmonics as their eigenfunctions, their eigenvalues are given by  $\lambda_k = \mu_k + \beta^2 \eta_k > 0$  for  $k > 0$  and  $\lambda_0 = \mu_0 + \beta^2 \eta_0 + \beta^2 > 0$ , and asymptotically  $\lambda_k \sim \tilde{C}(d)k^{-d}$ , where  $\tilde{C}(d) = C(d) + \beta^2 C_0(d)$ .

To conclude, this implies that  $\exists k_0, C_1(d) > 0$  and  $C_2(d) > 0$ , such that for all  $k \geq k_0$  it holds that

$$C_1 k^{-d} \leq \lambda_k \leq C_2 k^{-d}$$

and also, unless  $\beta = 0$ , for all  $k \geq 0$

$$\lambda_k > 0.$$

□

Next, we prove the second part of Theorem 1 that relates to deep FC networks with bias,  $\mathbf{k}^{\text{FC}_\beta(L)}$ , i.e. we prove the following lemma.

**Lemma 3.** *Let  $\mathbf{x}, \mathbf{z} \in \mathbb{S}^{d-1}$  and  $\mathbf{k}^{\text{FC}_\beta(L)}(\mathbf{x}^T \mathbf{z})$  as defined in Appendix A. Then*

1.  $\mathbf{k}^{\text{FC}_\beta(L)}$  decomposes according to (6) with  $\lambda_k > 0$  for all  $k \geq 0$
2.  $\exists k_0$  such that  $\forall k > k_0$  it holds that  $C_3 k^{-d} \leq \lambda_k$  in which  $C_3 > 0$  depends on the dimension  $d$
3.  $\mathcal{H}^{\text{FC}_\beta(L-1)} \subseteq \mathcal{H}^{\text{FC}_\beta(L)}$

*Proof.* Following Lemma 1, it holds that  $\mathbf{k}^{\text{FC}_\beta(L)}$  is zonal, and therefore can be decomposed according to (6). In order to prove the lemma we look at the recursive formulation of the NTK kernel, i.e.,

$$\mathbf{k}^{\text{FC}_\beta(L+1)} = \mathbf{k}^{\text{FC}_\beta(L)} \dot{\Sigma}^{(L)} + \Sigma^{(L)} + \beta^2. \quad (7)$$

Now, following Lemma 17 in [5] all of the eigenvalues of  $\dot{\Sigma}^{(L)}$  are positive, including  $\lambda_0 > 0$ . This implies that the constant function  $g(\mathbf{x}) \equiv 1 \in \mathcal{H}_{\dot{\Sigma}^{(L)}}$ .

Now, we use the norm multiplicity inequality in Sec. B.1 and show that  $\mathcal{H}_{\mathbf{k}^{\text{FC}_\beta(L)}} \subseteq \mathcal{H}_{\mathbf{k}^{\text{FC}_\beta(L)} \cdot \dot{\Sigma}^{(L)}}$ . Let  $f \in \mathcal{H}_{\mathbf{k}^{\text{FC}_\beta(L)}}$ , i.e.,  $\|f\|_{\mathcal{H}_{\mathbf{k}^{\text{FC}_\beta(L)}}} < \infty$ . We showed that  $1 \in \mathcal{H}_{\dot{\Sigma}^{(L)}}$ . Therefore,  $\|f \cdot 1\|_{\mathcal{H}_{\mathbf{k}^{\text{FC}_\beta(L)} \cdot \dot{\Sigma}^{(L)}}} \leq \|f\|_{\mathcal{H}_{\mathbf{k}^{\text{FC}_\beta(L)}}} \|1\|_{\mathcal{H}_{\dot{\Sigma}^{(L)}}} < \infty$ , implying that  $f \in \mathcal{H}_{\mathbf{k}^{\text{FC}_\beta(L)} \cdot \dot{\Sigma}^{(L)}}$ .

Finally, according to the kernel sum inclusion in Sec. B.1, relying on the recursive formulation (7) we have  $\mathcal{H}_{\mathbf{k}^{\text{FC}_\beta(L)}} \subseteq \mathcal{H}_{\mathbf{k}^{\text{FC}_\beta(L)} \cdot \dot{\Sigma}^{(L)}} \subseteq \mathcal{H}_{\mathbf{k}^{\text{FC}_\beta(L+1)}}$ . Therefore,

$$\mathcal{H}^{\text{FC}_\beta(2)} \subseteq \dots \subseteq \mathcal{H}^{\text{FC}_\beta(L-1)} \subseteq \mathcal{H}^{\text{FC}_\beta(L)}. \quad (8)$$

This completes the proof, by using Aronszajn's inclusion theorem as follows. Since  $H^{\mathbf{k}^{\text{FC}_\beta(2)}} \subseteq H^{\mathbf{k}^{\text{FC}_\beta(L)}}$ , then by Aronszajn's inclusion theorem  $\exists s > 0$  such that  $\mathbf{k}^{\text{FC}_\beta(2)} \ll s^2 \mathbf{k}^{\text{FC}_\beta(L)}$ . Since the kernels are zonal on the sphere (with uniform distribution of the data) their corresponding RKHS share the same eigenfunctions, namely the spherical harmonics.

Therefore, for all  $k \geq 0$  it holds

$$s^2 \lambda_k^{\mathbf{k}^{\text{FC}_\beta(L)}} \geq \lambda_k^{\mathbf{k}^{\text{FC}_\beta(2)}} > 0$$

and for  $k \rightarrow \infty$  it holds that

$$s^2 \lambda_k^{\mathbf{k}^{\text{FC}_\beta(L)}} \geq \lambda_k^{\mathbf{k}^{\text{FC}_\beta(2)}} \geq \frac{C_1}{k^d}$$

completing the proof.

□

## C Laplace Kernel in $\mathbb{S}^{d-1}$

The Laplace kernel  $\mathbf{k}(\mathbf{x}, \mathbf{y}) = e^{-c\|\mathbf{x}-\mathbf{y}\|}$  restricted to the sphere  $\mathbb{S}^{d-1}$  is defined as

$$K(\mathbf{x}, \mathbf{y}) = \mathbf{k}(\mathbf{x}^T \mathbf{y}) = e^{-c\sqrt{1-x^T y}} \quad (9)$$

where  $c > 0$  is a tuning parameter. We next prove an asymptotic bound on its eigenvalues.

**Theorem 2.** *Let  $\mathbf{x}, \mathbf{y} \in \mathbb{S}^{d-1}$  and  $\mathbf{k}(\mathbf{x}^T \mathbf{y}) = e^{-c\sqrt{1-x^T y}}$  be the Laplace kernel, restricted to  $\mathbb{S}^{d-1}$ . Then  $\mathbf{k}$  can be decomposed as in (6) with the eigenvalues  $\lambda_k$  satisfying  $\lambda_k > 0$  for all  $k \geq 0$  and  $\exists k_0$  such that  $\forall k > k_0$  it holds that:*

$$B_1 k^{-d} \leq \lambda_k \leq B_2 k^{-d}$$

where  $B_1, B_2 > 0$  are constants that depend on the dimension  $d$  and the parameter  $c$ .

Our proof relies on several supporting lemmas.

**Lemma 4.** ([17] Thm 1.14 page 6) *For all  $\alpha > 0$  it holds that*

$$\int_{\mathbb{R}^d} e^{-2\pi\|\mathbf{x}\|^\alpha} e^{-2\pi i \mathbf{t} \cdot \mathbf{x}} d\mathbf{x} = c_d \frac{\alpha}{(\alpha^2 + \|\mathbf{t}\|^2)^{(d+1)/2}}, \quad (10)$$

where  $c_d = \Gamma(\frac{d+1}{2})/(\pi^{(d+1)/2})$

**Lemma 5.** *Let  $f(\mathbf{x}) = e^{-c\|\mathbf{x}\|}$  with  $\mathbf{x} \in \mathbb{R}^d$ . Then, its Fourier transform  $\Phi(\mathbf{w})$  with  $\mathbf{w} \in \mathbb{R}^d$  is  $\Phi(\mathbf{w}) = \Phi(\|\mathbf{w}\|) = C(1 + \|\mathbf{w}\|^2/c^2)^{-(d+1)/2}$  for some constant  $C > 0$ .*

*Proof.* To calculate the Fourier transform we need to calculate the following integral

$$\Phi(\mathbf{w}) = \frac{1}{(2\pi)^d} \int_{\mathbb{R}^d} e^{-c\|\mathbf{x}\|} e^{-i\mathbf{x} \cdot \mathbf{w}} d\mathbf{x}.$$

According to the Lemma 4, plugging  $\alpha = \frac{c}{2\pi}$  and  $\mathbf{t} = \frac{\mathbf{w}}{2\pi}$  into (10) yields

$$\Phi(\mathbf{w}) = c_d \frac{c}{(c^2 + \|\mathbf{w}\|^2)^{(d+1)/2}} = \frac{c_d}{c^{d+1}} \frac{1}{\left(1 + \frac{\|\mathbf{w}\|^2}{c^2}\right)^{(d+1)/2}} = C \left(1 + \frac{\|\mathbf{w}\|^2}{c^2}\right)^{-(d+1)/2}$$

with  $C = \frac{c_d}{c^{d+1}} > 0$ . □

**Lemma 6.** ([11] Thm. 4.1) *Let  $f(\mathbf{x})$  be defined as  $f(\|\mathbf{x}\|)$  for all  $\mathbf{x} \in \mathbb{R}^d$ , and let  $\Phi(\mathbf{w}) = \Phi(\|\mathbf{w}\|)$  denote its Fourier Transform in  $\mathbb{R}^d$ . Then, its corresponding kernel on  $\mathbb{S}^{d-1}$  is defined as the restriction  $\mathbf{k}(\mathbf{x}^T \mathbf{y}) = f(\|\mathbf{x} - \mathbf{y}\|)$  with  $\mathbf{x}, \mathbf{y} \in \mathbb{S}^{d-1}$ . By Mercer's Theorem the spherical harmonic expansion of  $\mathbf{k}(\mathbf{x}^T \mathbf{y})$  is of the form*

$$\mathbf{k}(\mathbf{x}^T \mathbf{y}) = \sum_{k=0}^{\infty} \lambda_k \sum_{j=1}^{N(d,k)} Y_{k,j}(\mathbf{x}) Y_{k,j}(\mathbf{y}).$$

Then, the eigenvalues in the spherical harmonic expansion  $\lambda_k$  are related to the Fourier coefficients of  $f$ ,  $\Phi(t)$ , as follows

$$\lambda_k = \int_0^\infty t \Phi(t) J_{k+\frac{d-2}{2}}^2(t) dt, \quad (11)$$

where  $J_v(t)$  is the usual Bessel function of the first kind of order  $v$ .

Having, these supporting Lemmas, we can now prove **Theorem 2**.

*Proof.* First,  $\mathbf{k}(\cdot, \cdot)$  is a positive zonal kernel and hence can be written as

$$\mathbf{k}(\mathbf{x}^T \mathbf{y}) = \sum_{k=0}^{\infty} \lambda_k \sum_{j=1}^{N(d,k)} Y_{k,j}(\mathbf{x}) Y_{k,j}(\mathbf{y}).$$

Next, to derive the bounds we plug the Fourier coefficients,  $\Phi(\omega)$ , computed in Lemma 5, into the expression for the harmonic coefficients,  $\lambda_k$  (11), obtaining

$$\lambda_k = C \int_0^\infty \frac{t}{\left(1 + \frac{t^2}{c^2}\right)^{\frac{d+1}{2}}} J_{k+\frac{d-2}{2}}^2(t) dt.$$

Applying a change of variables  $t = cx$  we get

$$\lambda_k = c^2 C \int_0^\infty \frac{x}{\left(1 + x^2\right)^{\frac{d+1}{2}}} J_{k+\frac{d-2}{2}}^2(cx) dx. \quad (12)$$

We next bound this integral from both above and below. To get an upper bound we observe that for  $x \in [0, \infty)$   $x^2 < 1 + x^2$ , implying that  $x(1 + x^2)^{-(d+1)/2} < x^{-d}$ , and consequently

$$\lambda_k < c^2 C \int_0^\infty x^{-d} J_{k+\frac{d-2}{2}}^2(cx) dx := c^2 CA(k, d, c).$$

The above integral  $A(k, d, c)$  was computed in [18] (Sec. 13.41 page 402 with  $a := c$ ,  $\lambda := d$ , and  $\mu = \nu := k + (d - 2)/2$ ) which gives

$$A(k, d, c) = \int_0^\infty x^{-d} J_{k+\frac{d-2}{2}}^2(cx) dx = \frac{\left(\frac{c}{2}\right)^{d-1} \Gamma(d) \Gamma(k - \frac{1}{2})}{2\Gamma^2\left(\frac{d+1}{2}\right) \Gamma(k + d - \frac{1}{2})}. \quad (13)$$

Using Stirling's formula  $\Gamma(x) = \sqrt{2\pi} x^{x-1/2} e^{-x} (1 + O(x^{-1}))$  as  $x \rightarrow \infty$ . Consequently, for sufficiently large  $k \gg d$

$$\begin{aligned} \lambda_k &< c^2 CA(k, d, c) = c^2 C \frac{\left(\frac{c}{2}\right)^{d-1} \Gamma(d) \Gamma(k - \frac{1}{2})}{2\Gamma^2\left(\frac{d+1}{2}\right) \Gamma(k + d - \frac{1}{2})} \\ &\sim c^2 C \frac{\left(\frac{c}{2}\right)^{d-1} \Gamma(d)}{2\Gamma^2\left(\frac{d+1}{2}\right)} \cdot \frac{\left(k - \frac{1}{2}\right)^{k-1} e^{-k+\frac{1}{2}}}{\left(k + d - \frac{1}{2}\right)^{k+d-1} e^{-k-d+\frac{1}{2}}} (1 + O(k^{-1})) \\ &= B_2 k^{-d}, \end{aligned} \quad (14)$$

where  $B_2$  depends on  $c, C$  and the dimension  $d$ .

We use again the relation (12) to derive a lower bound for  $\lambda_k$ . First, note that since  $t, 1 + t^2, J_v^2(t)$  are all non-negative for  $t \in [0, \infty)$  and therefore

$$\begin{aligned} \lambda_k &\geq c^2 C \int_1^\infty \frac{x}{\left(1 + x^2\right)^{\frac{d+1}{2}}} J_{k+\frac{d-2}{2}}^2(cx) dx \geq c^2 C \int_1^\infty \frac{1}{2^{\frac{d+1}{2}} x^d} J_{k+\frac{d-2}{2}}^2(cx) dx \\ &= \frac{C c^2}{2^{\frac{d+1}{2}}} \left( \int_0^\infty x^{-d} J_{k+\frac{d-2}{2}}^2(cx) dx - \int_0^1 x^{-d} J_{k+\frac{d-2}{2}}^2(cx) dx \right) \\ &= \frac{C c^2}{2^{\frac{d+1}{2}}} \int_0^\infty x^{-d} J_{k+\frac{d-2}{2}}^2(cx) dx \left( 1 - \frac{\int_0^1 x^{-d} J_{k+\frac{d-2}{2}}^2(cx) dx}{\int_0^\infty x^{-d} J_{k+\frac{d-2}{2}}^2(cx) dx} \right) \\ &= \frac{C c^2}{2^{\frac{d+1}{2}}} A(k, d, c) \left( 1 - \frac{B(k, d, c)}{A(k, d, c)} \right), \end{aligned}$$

where  $B(k, d, c) := \int_0^1 x^{-d} J_{k+\frac{d-2}{2}}^2(cx) dx$ . The first integral,  $A(k, d, c)$ , was shown in (14) to converge asymptotically to  $B_2 k^{-d}$ . To bound the second integral,  $B(k, d, c)$ , we use an inequality from [18] (Section 3.31, page 49), which states that for  $v, t \in \mathbb{R}, v > -\frac{1}{2}$ ,

$$|J_v(t)| \leq \frac{2^{-v} t^v}{\Gamma(v+1)}.$$

This gives an upper bound for  $B(k, d, c)$

$$B(k, d, c) = \int_0^1 x^{-d} J_{k+\frac{d-2}{2}}^2(cx) dx \leq \int_0^1 x^{-d} \frac{2^{-2(k+\frac{d-2}{2})} (cx)^{2(k+\frac{d-2}{2})}}{\Gamma^2(k + \frac{d}{2})} dx \leq \frac{\left(\frac{c}{2}\right)^{2(k+\frac{d-2}{2})}}{\Gamma^2(k + \frac{d}{2})}.$$

Applying Stirling's formula we obtain  $B(k, d, c) \leq O\left(\frac{(\frac{c}{2})^{2(k+\frac{d}{2})}(k+d)}{(k+\frac{d}{2})^{2(k+\frac{d}{2})}}\right)$ , which implies that as  $k$  grows,  $\frac{B(k, d, c)}{A(k, d, c)} \rightarrow 0$ . Therefore, asymptotically for large  $k$

$$\lambda_k \geq \frac{Cc^2}{2^{\frac{d+1}{2}}} A(k, d, c) \left(1 - \frac{B(k, d, c)}{A(k, d, c)}\right) \geq \frac{Cc^2}{2^{\frac{d+1}{2}}} A(k, d, c),$$

from which we conclude that  $\lambda_k > B_1 k^{-d}$ , where the constant  $B_1$  depends on  $c, C$ , and  $d$ . We have therefore shown that there exists  $k_0$  such that  $\forall k > k_0$

$$B_1 k^{-d} \leq \lambda_k \leq B_2 k^{-d}.$$

Finally, to show that  $\lambda_k > 0$  for all  $k \geq 0$  we use again (11) in Lemma 6 which states that

$$\lambda_k = \int_0^\infty t \Phi(t) J_{k+\frac{d-2}{2}}^2(t) dt.$$

Note that in the interval  $(0, \infty)$  it holds that  $t > 0$  and  $\Phi(t) > 0$  due to Lemma 5. Therefore  $\lambda_k = 0$  implies that  $J_{k+\frac{d-2}{2}}^2(t)$  is identically 0 on  $(0, \infty)$ , contradicting the properties of the Bessel function of the first kind. Hence,  $\lambda_k > 0$  for all  $k$ .  $\square$

### C.1 Proof of main theorem

**Theorem 3.** Let  $\mathcal{H}^{\text{Lap}}$  denote the RKHS for the Laplace kernel restricted to  $\mathbb{S}^{d-1}$ , and let  $\mathcal{H}^{\text{FC}_\beta(\text{L})}$  denote the NTK corresponding to a FC network with  $L$  layers with bias, restricted to  $\mathbb{S}^{d-1}$ , then  $\mathcal{H}^{\text{Lap}} = \mathcal{H}^{\text{FC}_\beta(2)} \subseteq \mathcal{H}^{\text{FC}_\beta(\text{L})}$ .

*Proof.* Let  $\lambda_k^{\text{Lap}}$ ,  $\lambda_k^{\text{FC}_\beta(2)}$ , and  $\lambda_k^{\text{FC}_\beta(\text{L})}$  denote the eigenvalues of the three kernel,  $\mathbf{k}^{\text{Lap}}$ ,  $\mathbf{k}^{\text{FC}_\beta(2)}$ , and  $\mathbf{k}^{\text{FC}_\beta(\text{L})}$  in their Mercer's decomposition, i.e.,

$$\mathbf{k}(\mathbf{x}^T \mathbf{z}) = \sum_{k=0}^\infty \lambda_k \sum_{j=1}^{N(d,k)} Y_{k,j}(\mathbf{x}) Y_{k,j}(\mathbf{z}).$$

Denote by  $k_0$  the smallest  $k$  for which Theorems 1 and 2 hold simultaneously. We first show that  $\mathcal{H}^{\text{Lap}} \subseteq \mathcal{H}^{\text{FC}_\beta(2)}$ . Let  $f(\mathbf{x}) \in \mathcal{H}^{\text{Lap}}$ , and let  $f(\mathbf{x}) = \sum_{k=0}^\infty \sum_{j=0}^{N(d,k)} \alpha_{k,j} Y_{k,j}(\mathbf{x})$  denote its spherical harmonic decomposition. Then  $\|f\|_{\mathcal{H}^{\text{Lap}}} < \infty$  implies, due to Theorem 2, that

$$\sum_{k=k_0}^\infty \sum_{j=0}^{N(d,k)} \frac{1}{B_2} k^d \alpha_{k,j}^2 \leq \sum_{k=k_0}^\infty \sum_{j=0}^{N(d,k)} \frac{\alpha_{k,j}^2}{\lambda_k^{\text{Lap}}} < \infty.$$

Combining this with Theorem 1, and recalling that  $\lambda_k^{\text{FC}_\beta(2)} > 0$  for all  $k \geq 0$ , we have

$$\sum_{k=k_0}^\infty \sum_{j=0}^{N(d,k)} \frac{\alpha_{k,j}^2}{\lambda_k^{\text{FC}_\beta(2)}} \leq \sum_{k=k_0}^\infty \sum_{j=0}^{N(d,k)} \frac{1}{C_1} k^d \alpha_{k,j}^2 = \frac{B_2}{C_1} \sum_{k=k_0}^\infty \sum_{j=0}^{N(d,k)} \frac{1}{B_2} k^d \alpha_{k,j}^2 < \infty,$$

implying that  $\|f\|_{\mathcal{H}^{\text{FC}_\beta(2)}}^2 < \infty$ , and so  $\mathcal{H}^{\text{Lap}} \subseteq \mathcal{H}^{\text{FC}_\beta(2)}$ . Similar arguments can be used to show that  $\mathcal{H}^{\text{FC}_\beta(2)} \subseteq \mathcal{H}^{\text{Lap}}$ , proving that  $\mathcal{H}^{\text{FC}_\beta(2)} = \mathcal{H}^{\text{Lap}}$ . Finally, following the inclusion relation (8) the theorem is proved.  $\square$

## D NTK in $\mathbb{R}^d$

In this section we denote  $r_x = \|\mathbf{x}\|$ ,  $r_z = \|\mathbf{z}\|$  and by  $\hat{\mathbf{x}} = \mathbf{x}/r_x$ ,  $\hat{\mathbf{z}} = \mathbf{z}/r_z$ . We first prove Theorem 4 and as a consequence Lemma 7 is proved.

**Theorem 4.** Let  $\mathbf{k}^{\text{FC}_0(\text{L})}(\mathbf{x}, \mathbf{z})$ ,  $\mathbf{k}^{\text{FC}_\beta(\text{L})}(\mathbf{x}, \mathbf{z})$ ,  $\mathbf{x}, \mathbf{z} \in \mathbb{R}^d$ , denote the NTK kernel with  $L$  layers without bias and with bias initialized at zero, respectively. It holds that (1) Bias-free  $\mathbf{k}^{\text{FC}_0(\text{L})}$  is homogeneous of order 1. (2) Let  $\mathbf{k}^{\text{Bias}(\text{L})} = \mathbf{k}^{\text{FC}_\beta(\text{L})} - \mathbf{k}^{\text{FC}_0(\text{L})}$ . Then,  $\mathbf{k}^{\text{Bias}(\text{L})}$  is homogeneous of order 0.

**Lemma 7.** Let  $\mathbf{k}^{\text{FC}_\beta(L)}(\mathbf{x}, \mathbf{z})$ ,  $\mathbf{x}, \mathbf{z} \in \mathbb{S}^{d-1}$ , denote the NTK kernels for FC networks with  $L \geq 2$  layers, possibly with bias initialized with zero. This kernel is zonal, i.e.,  $\mathbf{k}^{\text{FC}_\beta(L)}(\mathbf{x}, \mathbf{z}) = \mathbf{k}^{\text{FC}_\beta(L)}(\mathbf{x}^T \mathbf{z})$ .

To that end, we first prove the following supporting Lemma.

**Lemma 8.** For  $\mathbf{x}, \mathbf{z} \in \mathbb{R}^d$  it holds that

$$\Theta^{(L)}(\mathbf{x}, \mathbf{z}) = r_x r_z \Theta^{(L)}(\hat{\mathbf{x}}, \hat{\mathbf{z}}) = r_x r_z \Theta^{(L)}(\hat{\mathbf{x}}^T \hat{\mathbf{z}}),$$

where  $\Theta^{(L)} = \mathbf{k}^{\text{FC}_0(L+1)}$ , as defined in Appendix A.

*Proof.* We prove this by induction over the recursive definition of  $\mathbf{k}^{\text{FC}_0(L+1)} = \Theta^{(L)}(\mathbf{x}, \mathbf{z})$ . Let  $\mathbf{x}, \mathbf{z} \in \mathbb{R}^d$ , then by definition

$$\Theta^{(0)}(\mathbf{x}, \mathbf{z}) = \mathbf{x}^T \mathbf{z} = r_x r_z \Theta^{(0)}(\hat{\mathbf{x}}, \hat{\mathbf{z}}) = r_x r_z \Theta^{(0)}(\hat{\mathbf{x}}^T \hat{\mathbf{z}})$$

and

$$\Sigma^{(0)}(\mathbf{x}, \mathbf{z}) = \mathbf{x}^T \mathbf{z} = r_x r_z \Sigma^{(0)}(\hat{\mathbf{x}}, \hat{\mathbf{z}}) = r_x r_z \Sigma^{(0)}(\hat{\mathbf{x}}^T \mathbf{z})$$

Assuming the induction hypothesis holds for  $l$ , i.e.,

$$\Theta^{(l)}(\mathbf{x}, \mathbf{z}) = r_x r_z \Theta^{(l)}(\hat{\mathbf{x}}, \hat{\mathbf{z}}) = r_x r_z \Theta^{(l)}(\hat{\mathbf{x}}^T \mathbf{z})$$

and

$$\Sigma^{(l)}(\mathbf{x}, \mathbf{z}) = r_x r_z \Sigma^{(l)}(\hat{\mathbf{x}}, \hat{\mathbf{z}}) = r_x r_z \Sigma^{(l)}(\hat{\mathbf{x}}^T \hat{\mathbf{z}})$$

we prove that those equalities are also true for  $l + 1$ .

By the definition of  $\lambda^{(l)}$  (2) and the induction hypothesis for  $\Sigma^{(l)}$  we have that

$$\lambda^{(l)}(\mathbf{x}, \mathbf{z}) = \frac{\Sigma^{(l)}(\mathbf{x}, \mathbf{z})}{\sqrt{\Sigma^{(l)}(\mathbf{x}, \mathbf{x}) \Sigma^{(l)}(\mathbf{z}, \mathbf{z})}} = \frac{\Sigma^{(l)}(\hat{\mathbf{x}}, \hat{\mathbf{z}})}{\sqrt{\Sigma^{(l)}(\hat{\mathbf{x}}, \hat{\mathbf{x}}) \Sigma^{(l)}(\hat{\mathbf{z}}, \hat{\mathbf{z}})}} = \lambda^{(l)}(\hat{\mathbf{x}}, \hat{\mathbf{z}}) = \lambda^{(l)}(\hat{\mathbf{x}}^T \hat{\mathbf{z}})$$

Plugging this result in the definitions of  $\Sigma$  (3) and  $\dot{\Sigma}$  (4), using the induction hypothesis we obtain

$$\begin{aligned} \Sigma^{(l+1)}(\mathbf{x}, \mathbf{z}) &= r_x r_z \Sigma^{(l+1)}(\hat{\mathbf{x}}, \hat{\mathbf{z}}) = r_x r_z \Sigma^{(l+1)}(\hat{\mathbf{x}}^T \hat{\mathbf{z}}) \\ \dot{\Sigma}^{(l+1)}(\mathbf{x}, \mathbf{z}) &= \dot{\Sigma}^{(l+1)}(\hat{\mathbf{x}}, \hat{\mathbf{z}}) = \dot{\Sigma}^{(l+1)}(\hat{\mathbf{x}}^T \hat{\mathbf{z}}) \end{aligned} \quad (15)$$

Finally, using the recursion formula (1) ( $\beta = 0$ ) and the induction hypothesis for  $\Theta^{(l)}$ , we obtain

$$\Theta^{(l+1)}(\mathbf{x}, \mathbf{z}) = r_x r_z \Theta^{(l+1)}(\hat{\mathbf{x}}, \hat{\mathbf{z}}) = r_x r_z \Theta^{(l+1)}(\hat{\mathbf{x}}^T \hat{\mathbf{z}})$$

□

A corollary of this Lemma is that  $\mathbf{k}^{\text{FC}_0(L)}$  is homogeneous of order 1 in  $\mathbb{R}^d$ , proving the first part of Theorem 4. Also, it is homogeneous of order 0 in  $\mathbb{S}^{d-1}$ , proving Lemma 7 for  $\beta = 0$ .

We next turn to proving the second part of Theorem 4, i.e., that  $\mathbf{k}^{\text{Bias}(L)} = \mathbf{k}^{\text{FC}_\beta(L)} - \mathbf{k}^{\text{FC}_0(L)}$  is homogeneous of order 0 in  $\mathbb{R}^d$ . By rewriting the recursive definition of  $\mathbf{k}^{\text{FC}_\beta(L)}$ , shown in Appendix A, we can express  $\mathbf{k}^{\text{Bias}(L)}$  in the following recursive manner  $\mathbf{k}^{\text{Bias}(1)} = \beta^2$ , and  $\mathbf{k}^{\text{Bias}(l+1)} = \mathbf{k}^{\text{Bias}(l)} \dot{\Sigma} + \beta^2$ . Therefore,  $\mathbf{k}^{\text{Bias}(L)}$  is homogeneous of order zero, since it depends only on  $\dot{\Sigma}$ , which is by itself homogeneous of order zero (15). This concludes Theorem 4.

Finally, Lemma 7 is proved, since  $\mathbf{k}^{\text{FC}_\beta(L)} = \mathbf{k}^{\text{FC}_0(L)} + \mathbf{k}^{\text{Bias}(L)}$ , and when restricted to  $\mathbb{S}^{d-1}$  both components are homogeneous of order 0.

**Theorem 5.** Let  $p(r)$  be a decaying density on  $[0, \infty)$  such that  $0 < \int_0^\infty p(r) r^2 dr < \infty$  and  $\mathbf{x}, \mathbf{z} \in \mathbb{R}^d$ .

1. Let  $\mathbf{k}_0(\mathbf{x}, \mathbf{z})$  be homogeneous of order 1 such that  $\mathbf{k}_0(\mathbf{x}, \mathbf{z}) = r_x r_z \hat{\mathbf{k}}_0(\hat{\mathbf{x}}^T \hat{\mathbf{z}})$ . Then its eigenfunctions with respect to  $p(r_x)$  are given by  $\Psi_{k,j} = a r_x Y_{k,j}(\hat{\mathbf{x}})$ , where  $Y_{k,j}$  are the spherical harmonics in  $\mathbb{S}^{d-1}$  and  $a \in \mathbb{R}$ .



2. Let  $\mathbf{k}(\mathbf{x}, \mathbf{z}) = \mathbf{k}_0(\mathbf{x}, \mathbf{z}) + \mathbf{k}_1(\mathbf{x}, \mathbf{z})$  so that  $\mathbf{k}_0$  as in 1 and  $\mathbf{k}_1$  is homogeneous of order 0. Then the eigenfunctions of  $\mathbf{k}$  are of the form  $\Psi_{k,j} = (ar_x + b) Y_{k,j}(\hat{\mathbf{x}})$ .

*Proof.* 1. Since  $\hat{\mathbf{k}}_0$  is zonal, its Mercer's representation reads

$$\hat{\mathbf{k}}_0(\hat{\mathbf{x}}, \hat{\mathbf{z}}) = \sum_{k=0}^{\infty} \lambda_k \sum_{j=1}^{N(d,k)} Y_{k,j}(\hat{\mathbf{x}}) Y_{k,j}(\hat{\mathbf{z}}),$$

where the spherical harmonics  $Y_{k,j}$  are the eigenfunctions of  $\hat{\mathbf{k}}_0$ . Consequently, as noted also in [5],

$$\mathbf{k}_0(\mathbf{x}, \mathbf{z}) = a^2 \sum_{k=0}^{\infty} \lambda_k \sum_{j=1}^{N(d,k)} r_x Y_{k,j}(\hat{\mathbf{x}}) r_z Y_{k,j}(\hat{\mathbf{z}}).$$

The orthogonality of the eigenfunctions  $\Psi_{k,j}(\mathbf{x}) = ar_x Y_{k,j}(\hat{\mathbf{x}})$  is verified as follows. Let  $\bar{p}(\mathbf{x})$  denote a probability density on  $\mathbb{R}^d$  such that  $\bar{p}(\mathbf{x}) = p(r_x)/A(r_x)$ , where  $A(r_x)$  denotes the surface area of a sphere of radius  $r_x$  in  $\mathbb{R}^d$ . Then,

$$\int_{\mathbb{R}^d} \Psi_{k,j}(\mathbf{x}) \Psi_{k',j'}(\mathbf{x}) \bar{p}(\mathbf{x}) d\mathbf{x} = a^2 \int_0^{\infty} \frac{r_x^{d+1} p(r_x)}{A(r_x)} dr_x \int_{\mathbb{S}^{d-1}} Y_{k,j}(\hat{\mathbf{x}}) Y_{k',j'}(\hat{\mathbf{x}}) d\hat{\mathbf{x}} = \delta_{k,k'} \delta_{j,j'},$$

where the rightmost equality is due to the orthogonality of the spherical harmonics and by setting

$$a^2 = \left( \int_0^{\infty} \frac{r_x^{d+1} p(r_x)}{A(r_x)} dr_x \right)^{-1}.$$

Clearly this integral is positive, and the conditions of the theorem guarantee that it is finite.

2. By the conditions of the theorem we can write

$$\mathbf{k}(\mathbf{x}, \mathbf{z}) = r_x r_z \hat{\mathbf{k}}_0(\hat{\mathbf{x}}^T \hat{\mathbf{z}}) + \hat{\mathbf{k}}_1(\hat{\mathbf{x}}^T \hat{\mathbf{z}}),$$

where  $\hat{\mathbf{x}}, \hat{\mathbf{z}} \in \mathbb{S}^{d-1}$ . On the hypersphere the spherical harmonics are the eigenfunctions of  $\mathbf{k}_0$  and  $\mathbf{k}_1$ . Denote their eigenvalues respectively by  $\lambda_k$  and  $\mu_k$ , so that

$$\int_{\mathbb{S}^{d-1}} \mathbf{k}_0(\hat{\mathbf{x}}^T \hat{\mathbf{z}}) \bar{Y}_k(\hat{\mathbf{z}}) d\hat{\mathbf{z}} = \lambda_k \bar{Y}_k(\hat{\mathbf{x}}) \quad (16)$$

$$\int_{\mathbb{S}^{d-1}} \mathbf{k}_1(\hat{\mathbf{x}}^T \hat{\mathbf{z}}) \bar{Y}_k(\hat{\mathbf{z}}) d\hat{\mathbf{z}} = \mu_k \bar{Y}_k(\hat{\mathbf{x}}), \quad (17)$$

where  $\bar{Y}_k(\hat{\mathbf{x}})$  denote the zonal spherical harmonics. We next show that the space spanned by the functions  $r_x \bar{Y}_k(\hat{\mathbf{x}})$  and  $\bar{Y}_k(\hat{\mathbf{x}})$  is fixed under the following integral transform

$$\int_{\mathbb{R}^d} \mathbf{k}(\mathbf{x}, \mathbf{z}) (\alpha r_z + \beta) \bar{Y}_k(\hat{\mathbf{z}}) \bar{p}(\mathbf{z}) d\mathbf{z} = (ar_x + b) \bar{Y}_k(\hat{\mathbf{x}}), \quad (18)$$

$\alpha, \beta, a, b \in \mathbb{R}$  are constants. The left hand side can be written as the application of an integral operator  $T(\mathbf{x}, \mathbf{z})$  to a function  $\Phi_{\alpha,\beta}^k(\mathbf{z}) = (\alpha r_z + \beta) \bar{Y}_k(\hat{\mathbf{z}})$ . Expressing this operator application in spherical coordinates yields

$$T(\mathbf{x}, \mathbf{z}) \Phi_{\alpha,\beta}^k(\mathbf{z}) = \int_0^{\infty} \frac{p(r_z) r_z^{d-1}}{A(r_z)} dr_z \int_{\hat{\mathbf{z}} \in \mathbb{S}^{d-1}} (r_x r_z \mathbf{k}_0(\hat{\mathbf{x}}^T \hat{\mathbf{z}}) + \mathbf{k}_1(\hat{\mathbf{x}}^T \hat{\mathbf{z}})) (\alpha r_z + \beta) \bar{Y}_k(\hat{\mathbf{z}}) d\hat{\mathbf{z}}.$$

We use (16) and (17) to substitute for the inner integral, obtaining

$$T(\mathbf{x}, \mathbf{z}) \Phi_{\alpha,\beta}^k(\mathbf{z}) = \int_0^{\infty} \frac{p(r_z) r_z^{d-1}}{A(r_z)} (\lambda_k r_x r_z + \mu_k) (\alpha r_z + \beta) \bar{Y}_k(\hat{\mathbf{x}}) dr_z.$$

Together with (18), this can be written as

$$T(\mathbf{x}, \mathbf{z}) \Phi_{\alpha,\beta}^k(\mathbf{z}) = \Phi_{a,b}(\mathbf{x}),$$

where

$$\begin{pmatrix} a \\ b \end{pmatrix} = \begin{pmatrix} \lambda_k & 0 \\ 0 & \mu_k \end{pmatrix} \begin{pmatrix} M_2 & M_1 \\ M_1 & M_0 \end{pmatrix} \begin{pmatrix} \alpha \\ \beta \end{pmatrix}$$

where  $M_q = \int_0^\infty \frac{r_z^{q+d-1} p(r_z)}{A(r_z)} dr_z$ ,  $0 \leq q \leq 2$ . By the conditions of the theorem these moments are finite. This proves that the space spanned by  $\{r_x \bar{Y}(\hat{\mathbf{x}}), \bar{Y}(\hat{\mathbf{x}})\}$  is fixed under  $T(\mathbf{x}, \mathbf{z})$ , and therefore the eigenfunctions of  $\mathbf{k}^{\text{FC}_\beta(\text{L})}(\mathbf{x}, \mathbf{z})$  take the form  $(\bar{a}r_x + \bar{b})\bar{Y}(\hat{\mathbf{x}})$  for some constants  $\bar{a}, \bar{b}$ . □

The implication of Theorem 5 is that the eigenvectors of  $\mathbf{k}^{\text{FC}_0(\text{L})}$  are the spherical harmonic functions, scaled by the norm of their arguments. With bias,  $\mathbf{k}^{\text{FC}_\beta(\text{L})}$  has up to  $2N(d, k)$  eigenfunctions for every frequency  $k$ , of the general form  $(ar_x + b)Y_{k,j}(\hat{\mathbf{x}})$  where  $a, b$  are constants that differ from one eigenfunction to the next.

## E Experimental Details

### E.1 The UCI dataSet

In this section, we provide experimental details for the UCI dataset. We use precisely the same pre-processed datasets, and follow the same performance comparison protocol as in [2].

**NTK Specifications** We reproduced the results of [2] using the publicly available code<sup>1</sup>, and followed the same protocol as in [2]. The total number of kernels evaluated in [2] are 15 and the SVM cost value parameter  $\mathbf{C}$  is tuned from  $10^{-2}$  to  $10^4$  by powers of 10. Hence, the total number of hyper-parameter combinations searched using cross-validation is 105 ( $15 \times 7$ ).

**Exponential Kernels Specifications** For the Laplace and Gaussian kernels, we searched for 10 kernel width values ( $1/c$ ) from  $2^{-2} \times \nu$  to  $\nu$  in the log space with base 2, where  $\nu$  is chosen heuristically as the median of pairwise  $l_2$  distances between data points (known as the *median trick* [7]). So, the total number of kernel evaluations is 10. For  $\gamma$ -exponential, we searched through 5 equally spaced values of  $\gamma$  from 0.5 to 2. Since we wanted to keep the number of the kernel evaluations the same as for NTK in [2], we searched through only three kernel bandwidth values ( $1/c$ ) which are 1,  $\nu$  and  $\#features$  (default value in the `sklearn` package<sup>2</sup>). So, the total number of kernel evaluations is 15 ( $5 \times 3$ ).

For a fair comparison with [2], we swept the same range of SVM cost value parameter  $\mathbf{C}$  as in [2], i.e., from  $10^{-2}$  to  $10^4$  by powers of 10. Hence, the total number of hyper-parameter search using cross-validation is 70 ( $10 \times 7$ ) for Laplace and 105 ( $15 \times 7$ ) for  $\gamma$ -exponential which is the same as for NTK in [2].

### E.2 Large scale datasets

We used the experimental setup mentioned in [14] and the publicly available code<sup>3</sup>. [14] solves kernel ridge regression (KRR [16]) using the FALKON algorithm, which solves the following linear system

$$(K_{nn} + \lambda nI) \alpha = \hat{\mathbf{y}},$$

where  $K$  is an  $n \times n$  kernel matrix defined by  $(K)_{ij} = K(x_i, x_j)$ ,  $\hat{\mathbf{y}} = (y_1, \dots, y_n)^T$ , and  $\lambda$  is the regularization parameter. Refer to [14] for more details.

In Table 1, we provide the hyper parameters chosen with cross validation.

<sup>1</sup><https://github.com/LeoYu/neural-tangent-kernel-UCI>

<sup>2</sup>[https://scikit-learn.org/stable/modules/generated/sklearn.metrics.pairwise.rbf\\_kernel.html](https://scikit-learn.org/stable/modules/generated/sklearn.metrics.pairwise.rbf_kernel.html)

<sup>3</sup>[https://github.com/LCSL/FALKON\\_paper](https://github.com/LCSL/FALKON_paper)

|                   | MillionSongs [4]                              | SUSY [13]                                     | HIGGS [13]                                    |
|-------------------|-----------------------------------------------|-----------------------------------------------|-----------------------------------------------|
| H- $\gamma$ -exp. | $\gamma = 1.4, \sigma = 5, \lambda = 1e^{-6}$ | $\gamma = 1.8, \sigma = 5, \lambda = 1e^{-7}$ | $\gamma = 1.6, \sigma = 8, \lambda = 1e^{-8}$ |
| H-Laplace         | $\sigma = 3, \lambda = 1e^{-6}$               | $\sigma = 4, \lambda = 1e^{-7}$               | $\sigma = 8, \lambda = 1e^{-8}$               |
| NTK               | $L = 9, \lambda = 1e^{-9}$                    | $L = 3, \lambda = 1e^{-8}$                    | $L = 3, \lambda = 1e^{-6}$                    |
| H-Gaussian        | $\sigma = 8, \lambda = 1e^{-6}$               | $\sigma = 3, \lambda = 1e^{-7}$               | $\sigma = 8, \lambda = 1e^{-8}$               |

Table 1: Hyper-parameters chosen with cross validation for the different kernels.

### E.3 C-Exp: Convolutional Exponential Kernels

Let  $\mathbf{x} = (x_1, \dots, x_d)^T$  and  $\mathbf{z} = (z_1, \dots, z_d)^T$  denote two vectorized images. Let  $P$  denote a window function (we used  $3 \times 3$  windows). Our hierarchical exponential kernels are defined by  $\Theta(\mathbf{x}, \mathbf{z})$  as follows:

$$\begin{aligned} \Theta_{ij}^{[0]}(\mathbf{x}, \mathbf{z}) &= x_i z_j \\ s_{ij}^{[h]}(\mathbf{x}, \mathbf{z}) &= \sum_{m \in P} \Theta^{[h]}(x_{i+m}, z_{j+m}) + \beta^2 \\ \Theta_{ij}^{[h+1]}(\mathbf{x}, \mathbf{z}) &= K(s_{ij}^{[h]}(\mathbf{x}, \mathbf{z}), s_{ii}^{[h]}(\mathbf{x}, \mathbf{x}), s_{jj}^{[h]}(\mathbf{z}, \mathbf{z})) \\ \bar{\Theta}(\mathbf{x}, \mathbf{z}) &= \sum_i \Theta_{ii}^{[L]}(\mathbf{x}, \mathbf{z}) \end{aligned}$$

where  $\beta \geq 0$  denotes the bias and the last step is analogous to a fully connected layer in networks, and we set

$$K(s_{ij}, s_{ii}, s_{jj}) = \sqrt{s_{ii}s_{jj}} \mathbf{k} \left( \frac{s_{ij}}{\sqrt{s_{ii}s_{jj}}} \right)$$

where  $\mathbf{k}$  can be any kernel defined on the sphere. In the experiments we applied this scheme to the three exponential kernels, Laplace, Gaussian and  $\gamma$ -exponential.

**Technical details** We used the following four kernels:

**CNTK [1]**  $L = 6, \beta = 3$ .

**C-Exp Laplace.**  $L = 3, \beta = 3, \mathbf{k}(\mathbf{x}^T \mathbf{z}) = a + be^{-c\sqrt{2-2\mathbf{x}^T \mathbf{z}}}$  with  $a = -11.491, b = 12.606, c = 0.048$ .

**C-Exp  $\gamma$ -exponential.**  $L = 8, \beta = 3, \mathbf{k}(\mathbf{x}^T \mathbf{z}) = a + be^{-c(2-2\mathbf{x}^T \mathbf{z})^{\gamma/2}}$  with  $a = -0.276, b = 1.236, c = 0.424, \gamma = 1.888$ .

**C-Exp Gaussian.**  $L = 12, \beta = 3, \mathbf{k}(\mathbf{x}^T \mathbf{z}) = a + be^{-c(2-2\mathbf{x}^T \mathbf{z})}$  with  $a = -0.22, b = 1.166, c = 0.435$ .

We set  $\beta$  in these experiments with cross validation in  $\{1, \dots, 10\}$ . For each kernel  $\mathbf{k}$  above, the parameters  $a, b, c$  and  $\gamma$  were chosen using non-linear least squares optimization with the objective  $\sum_{u \in U} (\mathbf{k}(u) - \mathbf{k}^{\text{FC}_{\beta}(2)}(u))^2$ , where  $\mathbf{k}^{\text{FC}_{\beta}(2)}$  is the NTK for a two-layer network defined in (5) with bias  $\beta = 1$ , and the set  $U$  included (inner products between) pairs of normalized  $3 \times 3 \times 3$  patches drawn uniformly from the CIFAR images. The number of layers  $L$  is chosen by cross validation.

For the training phase we used 1-hot vectors from which we subtracted 0.1, as in [12]. For the classification phase, as in [10], we normalized the kernel matrices such that all the diagonal elements are ones. To avoid ill conditioned kernel matrices we applied ridge regression with a regularization factor of  $\lambda = 5 \cdot 10^{-5}$ . Finally, to reduce overall running times, we parallelized the kernel computations on NVIDIA Tesla V100 GPUs.

## References

- [1] Sanjeev Arora, Simon S Du, Wei Hu, Zhiyuan Li, Russ R Salakhutdinov, and Ruosong Wang. On exact computation with an infinitely wide neural net. In *Advances in Neural Information Processing Systems*, pages 8139–8148, 2019.
- [2] Sanjeev Arora, Simon S. Du, Zhiyuan Li, Ruslan Salakhutdinov, Ruosong Wang, and Dingli Yu. Harnessing the power of infinitely wide deep nets on small-data tasks. In *International Conference on Learning Representations*, 2020.

- [3] Francis Bach. Breaking the curse of dimensionality with convex neural networks. *The Journal of Machine Learning Research*, 18(1):629–681, 2017.
- [4] Thierry Bertin-Mahieux, Daniel P.W. Ellis, Brian Whitman, and Paul Lamere. The million song dataset. In *Proceedings of the 12th International Conference on Music Information Retrieval (ISMIR)*, 2011.
- [5] Alberto Bietti and Julien Mairal. On the inductive bias of neural tangent kernels. In *Advances in Neural Information Processing Systems*, pages 12873–12884, 2019.
- [6] Youngmin Cho and Lawrence K Saul. Analysis and extension of arc-cosine kernels for large margin classification. *arXiv preprint arXiv:1112.3712*, 2011.
- [7] Bo Dai, Bo Xie, Niao He, Yingyu Liang, Anant Raj, Maria-Florina F Balcan, and Le Song. Scalable kernel methods via doubly stochastic gradients. In *Advances in Neural Information Processing Systems*, pages 3041–3049, 2014.
- [8] Amit Daniely, Roy Frostig, and Yoram Singer. Toward deeper understanding of neural networks: The power of initialization and a dual view on expressivity. In *Advances In Neural Information Processing Systems*, pages 2253–2261, 2016.
- [9] Arthur Jacot, Franck Gabriel, and Clément Hongler. Neural tangent kernel: Convergence and generalization in neural networks. In *Advances in neural information processing systems*, pages 8571–8580, 2018.
- [10] Zhiyuan Li, Ruosong Wang, Dingli Yu, Simon S Du, Wei Hu, Ruslan Salakhutdinov, and Sanjeev Arora. Enhanced convolutional neural tangent kernels. *arXiv preprint arXiv:1911.00809*, 2019.
- [11] Francis J Narcowich and Joseph D Ward. Scattered data interpolation on spheres: error estimates and locally supported basis functions. *SIAM Journal on Mathematical Analysis*, 33(6):1393–1410, 2002.
- [12] Roman Novak, Lechao Xiao, Jaehoon Lee, Yasaman Bahri, Greg Yang, Jiri Hron, Daniel A Abolafia, Jeffrey Pennington, and Jascha Sohl-Dickstein. Bayesian deep convolutional networks with many channels are gaussian processes. *arXiv preprint arXiv:1810.05148*, 2018.
- [13] Peter Sadowski Pierre Baldi and Daniel Whiteson. Searching for exotic particles in high-energy physics with deep learning. *Nature communications*, 5, 2014.
- [14] Alessandro Rudi, Luigi Carratino, and Lorenzo Rosasco. Falcon: An optimal large scale kernel method. In *Advances in Neural Information Processing Systems*, pages 3888–3898, 2017.
- [15] Saburo Saitoh and Yoshihiro Sawano. *Theory of reproducing kernels and applications*. Springer, 2016.
- [16] Bernhard Scholkopf and Alexander J Smola. *Learning with kernels: support vector machines, regularization, optimization, and beyond*. MIT press, 2001.
- [17] Elias M Stein and Guido Weiss. *Introduction to Fourier analysis on Euclidean spaces (PMS-32)*, volume 32. Princeton university press, 2016.
- [18] George Neville Watson. *A treatise on the theory of Bessel functions*. Cambridge university press, 1966.
